# Supplementary material for: Longitudinal Changes in the Concentration of Major Human Milk Proteins in the First Six Months of Lactation and Their Effects on Infant Growth
Source: MDPI journal article supplement (doi:10.3390/nu13051476), 2021-04-27
Supplement: s1 [file s1]

**Table S2.** Quality control in the quantification of milk proteins.

| Protein               | Number of tests | Coefficient of variation (%) |
|-----------------------|-----------------|------------------------------|
| $\alpha$ -lactalbumin | 14              | 9.0                          |
| Lactoferrin           | 8               | 4.6                          |
| $\beta$ -casein       | 8               | 6.6                          |
| $\alpha_s$ -1 casein  | 8               | 5.5                          |
| $\kappa$ -casein      | 8               | 6.6                          |
| Osteopontin           | 6               | 9.3                          |

When testing the milk samples from the present study, another human milk sample that was previously collected was tested simultaneously every day. The coefficients of variation of protein concentrations in the identical milk sample were presented.
