# Supplementary material for: Longitudinal Changes in the Concentration of Major Human Milk Proteins in the First Six Months of Lactation and Their Effects on Infant Growth
Source: MDPI journal article supplement (doi:10.3390/nu13051476), 2021-04-27
Supplement: s1 [file s1]

**Table S1.** Internal standards used in protein quantification.

| <b>Protein</b>           | <b>Amino acid sequence</b> | <b>Concentration (µg/mL)</b> |
|--------------------------|----------------------------|------------------------------|
| α-lactalbumin            | CELSQLLK                   | 20                           |
| Lactoferrin              | VPSHAVVAR                  | 10                           |
| β-casein                 | VMPVLK                     | 20                           |
| α <sub>s</sub> -1 casein | NNVMLQW                    | 20                           |
| κ-casein                 | QYLPNSHPPTVVR              | 20                           |
| Osteopontin              | GDSVVYGLR                  | 10                           |

Internal standards were purchased from ChinaPeptides Co. Ltd (Shanghai, China).
