# Supplementary material for: Longitudinal Changes in the Concentration of Major Human Milk Proteins in the First Six Months of Lactation and Their Effects on Infant Growth
Source: MDPI journal article supplement (doi:10.3390/nu13051476), 2021-04-27
Supplement: s1 [file s1]

**Table S3.** Concentrations of human milk proteins across baseline characteristics.

|                                                      |                   | 1–5 days      | 8–14 days     | 1 month        | 6 months      | <i>p</i> -interaction |
|------------------------------------------------------|-------------------|---------------|---------------|----------------|---------------|-----------------------|
| Total protein                                        |                   |               |               |                |               |                       |
| Maternal age (years)                                 | Below 30          | 1738.3(422.6) | 1496.7(402.2) | 1339.7(453.2)  | 930.4(338.4)* | 0.067                 |
|                                                      | 30 and above      | 1565.7(467.0) | 1612.4(431.5) | 1407.9(331.4)  | 1078.5(314.7) |                       |
| Education                                            | Below college     | 1663.5(501.9) | 1501.2(318.2) | 1268.2(399.6)* | 943.9(297.5)  | 0.738                 |
|                                                      | College and above | 1668.0(413.8) | 1572.2(467.4) | 1429.8(401.0)  | 1022.9(354.0) |                       |
| Per capita household income (RMB/month)              | 4000 and below    | 1636.7(504.7) | 1581.6(387.2) | 1311.1(402.5)  | 939.8(278.5)  | 0.445                 |
|                                                      | Above 4000        | 1681.4(418.5) | 1525.3(433.4) | 1399.4(407.9)  | 1020.1(358.2) |                       |
| Pre-gestational body mass index (kg/m <sup>2</sup> ) | <20.7             | 1651.9(478.9) | 1513.7(445.7) | 1352.7(413.5)  | 991.4(378.9)  | 0.748                 |
|                                                      | ≥20.7             | 1678.3(423.7) | 1572.7(391.5) | 1381.9(403.1)  | 995.9(298.2)  |                       |
| Mode of delivery                                     | Cesarean delivery | 1631.3(507.7) | 1587.7(320.1) | 1348.1(319.5)  | 1089.9(353.7) | 0.149                 |
|                                                      | Vaginal delivery  | 1678.0(428.5) | 1530.4(446.1) | 1375.3(433.9)  | 961.0(324.4)  |                       |
| Parity                                               | First parity      | 1681.3(424.6) | 1520.1(421.2) | 1372.3(413.2)  | 982.3(338.0)  | 0.788                 |
|                                                      | Others            | 1610.7(531.5) | 1634.5(396.0) | 1353.9(388.8)  | 1033.9(328.8) |                       |
| Infant gender                                        | Female            | 1617.7(486.9) | 1565.2(445.0) | 1386.3(431.7)  | 978.7(277.5)  | 0.938                 |
|                                                      | Male              | 1697.0(422.0) | 1531.8(399.8) | 1356.3(391.5)  | 1003.9(370.1) |                       |
| α-lactalbumin                                        |                   |               |               |                |               |                       |
| Maternal age (years)                                 | Below 30          | 325.6(67.2)   | 327.2(65.3)   | 310.7(60.2)    | 210.1(58.0)   | 0.390                 |
|                                                      | 30 and above      | 331.2(58.3)   | 343.2(46.7)   | 311.1(53.8)    | 207.7(45.0)   |                       |
| Education                                            | Below college     | 309.3(68.6)*  | 320.2(63.7)   | 305.7(52.3)    | 214.6(54.2)   | 0.004                 |
|                                                      | College and above | 339.7(57.3)   | 342.3(53.9)   | 314.1(60.4)    | 205.8(51.8)   |                       |
| Per capita household income (RMB/month)              | 4000 and below    | 312.8(72.1)   | 327.0(67.5)   | 307.0(53.9)    | 222.6(57.1)   | 0.002                 |
|                                                      | Above 4000        | 335.7(57.4)   | 337.7(53.2)   | 313.0(59.3)    | 202.5(49.3)   |                       |
| Pre-gestational body mass                            | <20.7             | 324.1(65.1)   | 329.9(62.1)   | 308.9(66.5)    | 205.0(53.3)   | 0.759                 |

|                                                      |                   |              |              |              |               |       |
|------------------------------------------------------|-------------------|--------------|--------------|--------------|---------------|-------|
| index (kg/m <sup>2</sup> )                           |                   |              |              |              |               |       |
|                                                      | ≥20.7             | 331.1(62.3)  | 337.4(55.6)  | 312.6(48.4)  | 212.4(52.2)   |       |
| Mode of delivery                                     | Cesarean delivery | 327.6(65.8)  | 351.4(62.9)  | 300.9(46.6)  | 220.7(62.4)   | 0.378 |
|                                                      | Vaginal delivery  | 328.0(63.0)  | 327.8(56.1)  | 314.3(60.5)  | 205.1(48.6)   |       |
| Parity                                               | First parity      | 328.8(62.5)  | 336.3(59.0)  | 313.7(59.7)  | 207.5(53.3)   | 0.173 |
|                                                      | Others            | 324.7(67.9)  | 325.4(57.5)  | 301.0(47.8)  | 214.3(50.8)   |       |
| Infant gender                                        | Female            | 325.6(63.5)  | 337.9(49.8)  | 308.3(58.3)  | 203.6(46.9)   | 0.291 |
|                                                      | Male              | 329.4(63.8)  | 331.2(63.9)  | 312.6(57.0)  | 212.6(56.1)   |       |
| <b>Lactoferrin</b>                                   |                   |              |              |              |               |       |
| Maternal age (years)                                 | Below 30          | 281.3(105.0) | 169.1(55.7)  | 109.2(42.0)  | 64.0(18.5)    | 0.746 |
|                                                      | 30 and above      | 321.5(202.8) | 216.2(101.9) | 122.4(49.5)  | 78.0(34.2)    |       |
| Education                                            | Below college     | 286.4(110.8) | 197.6(81.8)  | 125.9(49.1)  | 68.5(15.9)    | 0.781 |
|                                                      | College and above | 311.2(190.8) | 181.6(82.2)  | 104.3(39.6)  | 72.3(35.7)    |       |
| Per capita household income (RMB/month)              | 4000 and below    | 253.6(99.2)  | 184.6(82.6)  | 116.6(47.7)  | 70.2(14.9)    | 0.211 |
|                                                      | Above 4000        | 327.0(176.1) | 192.9(82.1)  | 113.7(44.5)  | 70.6(33.8)    |       |
| Pre-gestational body mass index (kg/m <sup>2</sup> ) | <20.7             | 278.6(130.4) | 168.5(68.3)  | 100.2(35.5)* | 66.3(21.4)    | 0.508 |
|                                                      | ≥20.7             | 312.3(169.4) | 205.4(88.2)  | 126.1(49.3)  | 73.3(31.0)    |       |
| Mode of delivery                                     | Cesarean delivery | 284.0(145.9) | 195.7(100.1) | 118.6(51.6)  | 87.7(33.3)*** | 0.024 |
|                                                      | Vaginal delivery  | 307.0(160.4) | 185.7(69.9)  | 112.7(42.0)  | 61.2(18.4)    |       |
| Parity                                               | First parity      | 304.4(124.0) | 179.1(64.0)  | 113.1(43.0)  | 65.8(22.9)    | 0.150 |
|                                                      | Others            | 280.6(229.9) | 219.6(117.5) | 120.3(53.2)  | 82.0(34.8)    |       |
| Infant gender                                        | Female            | 315.3(193.4) | 195.1(78.4)  | 117.9(38.3)  | 79.3(32.6)    | 0.435 |
|                                                      | Male              | 288.8(128.6) | 185.8(84.7)  | 113.0(49.9)  | 65.7(23.4)    |       |
| <b>Osteopontin</b>                                   |                   |              |              |              |               |       |
| Maternal age (years)                                 | Below 30          | 77.3(27.6)   | 59.5(15.0)   | 47.9(12.4)   | 19.8(12.8)*   | 0.018 |
|                                                      | 30 and above      | 64.4(32.8)   | 57.5(15.4)   | 41.1(16.9)   | 28.0(10.3)    |       |

|                                         |                   |               |              |               |               |       |
|-----------------------------------------|-------------------|---------------|--------------|---------------|---------------|-------|
| Education                               | Below college     | 70.6(31.9)    | 56.6(15.1)   | 47.5(13.0)    | 18.8(13.2)**  | 0.198 |
|                                         | College and above | 73.0(29.2)    | 60.6(15.0)   | 42.5(16.2)    | 28.3(9.2)     |       |
| Per capita household income (RMB/month) | 4000 and below    | 61.3(31.4)    | 54.9(18.1)   | 45.6(13.9)    | 21.3(12.8)    | 0.415 |
|                                         | Above 4000        | 78.4(28.2)    | 61.3(12.1)   | 44.5(15.6)    | 25.2(11.9)    |       |
| Pre-gestational body mass index (kg/m²) | <20.7             | 70.7(23.3)    | 58.3(13.7)   | 42.8(12.2)    | 23.9(11.3)    | 0.672 |
|                                         | ≥20.7             | 72.5(34.7)    | 58.9(16.2)   | 46.6(16.5)    | 23.3(13.2)    |       |
| Mode of delivery                        | Cesarean delivery | 65.3(26.3)    | 58.4(13.8)   | 44.1(15.3)    | 27.5(11.8)    | 0.133 |
|                                         | Vaginal delivery  | 75.5(32.3)    | 58.8(16.0)   | 45.5(14.7)    | 21.5(12.2)    |       |
| Parity                                  | First parity      | 73.6(26.7)    | 59.9(13.1)   | 49.1(11.5)*** | 23.6(12.4)    | 0.240 |
|                                         | Others            | 66.2(40.4)    | 55.0(19.8)   | 32.8(17.0)    | 23.5(12.5)    |       |
| Infant gender                           | Female            | 71.1(28.3)    | 58.3(15.4)   | 40.5(17.9)    | 26.8(12.8)    | 0.279 |
|                                         | Male              | 72.1(31.9)    | 58.9(15.1)   | 47.8(11.8)    | 21.8(11.8)    |       |
| Total casein                            |                   |               |              |               |               |       |
| Maternal age (years)                    | Below 30          | 712.9(182.9)  | 604.6(129.3) | 522.7(83.3)   | 341.5(132.7)* | 0.275 |
|                                         | 30 and above      | 676.1(204.0)  | 668.7(147.6) | 566.3(159.6)  | 412.5(93.8)   |       |
| Education                               | Below college     | 698.5(216.4)  | 620.4(135.0) | 554.3(130.2)  | 360.4(110.4)  | 0.693 |
|                                         | College and above | 695.7(165.2)  | 643.6(146.1) | 529.1(116.2)  | 387.5(131.4)  |       |
| Per capita household income (RMB/month) | 4000 and below    | 675.6(236.6)  | 614.4(131.4) | 553.6(134.8)  | 372.2(127.0)  | 0.565 |
|                                         | Above 4000        | 710.8(158.7)  | 644.7(146.3) | 533.0(115.1)  | 375.1(118.7)  |       |
| Pre-gestational body mass index (kg/m²) | <20.7             | 689.1(181.5)  | 602.2(123.5) | 505.3(97.8)   | 356.0(144.6)  | 0.898 |
|                                         | ≥20.7             | 702.7(200.3)  | 655.0(149.1) | 568.9(133.8)  | 386.5(101.9)  |       |
| Mode of delivery                        | Cesarean delivery | 624.1(198.1)* | 630.1(169.7) | 532.1(165.1)  | 419.2(141.5)  | 0.013 |
|                                         | Vaginal delivery  | 739.5(176.4)  | 633.5(121.6) | 547.0(91.5)   | 349.8(102.7)  |       |
| Parity                                  | First parity      | 706.5(190.0)  | 628.2(110.3) | 545.1(88.7)   | 372.7(118.5)  | 0.713 |

|                                         |                   |               |              |              |              |       |
|-----------------------------------------|-------------------|---------------|--------------|--------------|--------------|-------|
|                                         | Others            | 668.3(199.7)  | 643.9(209.1) | 530.9(195.8) | 377.0(131.3) |       |
| Infant gender                           | Female            | 687.3(214.2)  | 652.9(144.2) | 504.7(111.2) | 391.5(110.7) | 0.578 |
|                                         | Male              | 702.8(179.8)  | 618.9(137.6) | 565.2(125.6) | 364.5(126.6) |       |
| <b>β-casein</b>                         |                   |               |              |              |              |       |
| Maternal age (years)                    | Below 30          | 533.3(142.0)  | 465.6(95.8)  | 423.2(65.8)  | 290.0(111.4) | 0.252 |
|                                         | 30 and above      | 504.3(157.2)  | 509.2(140.4) | 460.7(137.1) | 345.7(80.7)  |       |
| Education                               | Below college     | 518.5(167.1)  | 472.5(118.5) | 449.9(110.7) | 305.7(90.0)  | 0.822 |
|                                         | College and above | 523.4(128.3)  | 495.9(118.5) | 429.3(96.8)  | 325.1(113.0) |       |
| Per capita household income (RMB/month) | 4000 and below    | 504.7(174.6)  | 462.7(117.4) | 449.5(115.2) | 310.7(104.0) | 0.619 |
|                                         | Above 4000        | 531.1(130.3)  | 499.6(117.8) | 432.3(95.6)  | 318.7(101.5) |       |
| Pre-gestational body mass index (kg/m²) | <20.7             | 522.1(137.6)  | 463.6(95.1)  | 410.5(81.4)  | 300.2(122.5) | 0.898 |
|                                         | ≥20.7             | 520.1(156.8)  | 500.2(132.0) | 461.3(113.8) | 326.1(84.5)  |       |
| Mode of delivery                        | Cesarean delivery | 465.9(148.8)* | 480.0(146.9) | 432.4(141.5) | 351.7(121.3) | 0.013 |
|                                         | Vaginal delivery  | 552.8(139.8)  | 487.1(99.3)  | 443.6(74.5)  | 296.1(85.2)  |       |
| Parity                                  | First parity      | 526.7(148.2)  | 482.2(87.9)  | 441.1(74.5)  | 315.1(100.2) | 0.788 |
|                                         | Others            | 503.1(151.7)  | 490.9(184.5) | 434.4(165.4) | 316.3(108.9) |       |
| Infant gender                           | Female            | 507.5(170.4)  | 495.8(117.9) | 404.8(95.8)  | 325.1(92.1)  | 0.551 |
|                                         | Male              | 528.6(135.4)  | 477.1(119.2) | 461.8(103.2) | 310.2(107.3) |       |
| <b>α<sub>s</sub>-1 casein</b>           |                   |               |              |              |              |       |
| Maternal age (years)                    | Below 30          | 125.4(45.4)   | 94.7(33.5)*  | 65.3(18.1)   | 31.4(20.0)*  | 0.736 |
|                                         | 30 and above      | 125.4(44.0)   | 117.3(34.8)  | 74.4(23.5)   | 45.7(15.9)   |       |
| Education                               | Below college     | 128.2(48.4)   | 105.6(36.9)  | 71.5(21.6)   | 35.1(19.5)   | 0.487 |
|                                         | College and above | 122.4(40.5)   | 103.4(35.0)  | 67.1(20.4)   | 40.6(19.4)   |       |
| Per capita household income (RMB/month) | 4000 and below    | 121.2(54.9)   | 108.2(36.6)  | 70.5(20.7)   | 39.0(21.2)   | 0.631 |
|                                         | Above 4000        | 128.1(37.0)   | 101.8(35.2)  | 68.3(21.4)   | 37.1(18.5)   |       |

|                                         |                   |             |             |             |            |       |
|-----------------------------------------|-------------------|-------------|-------------|-------------|------------|-------|
| Pre-gestational body mass index (kg/m²) | <20.7             | 115.8(43.1) | 94.4(32.4)  | 61.7(17.1)* | 34.4(19.4) | 0.371 |
|                                         | ≥20.7             | 132.1(44.7) | 112.1(36.5) | 74.9(21.9)  | 40.3(19.5) |       |
| Mode of delivery                        | Cesarean delivery | 109.7(40.7) | 106.2(41.0) | 68.0(22.7)  | 43.9(20.7) | 0.082 |
|                                         | Vaginal delivery  | 134.5(44.4) | 103.4(32.6) | 70.0(20.1)  | 34.7(18.3) |       |
| Parity                                  | First parity      | 128.4(45.5) | 103.0(32.7) | 70.6(18.9)  | 38.0(17.9) | 0.745 |
|                                         | Others            | 116.0(41.1) | 108.8(44.2) | 65.2(26.4)  | 37.7(23.8) |       |
| Infant gender                           | Female            | 129.6(42.8) | 111.0(32.8) | 67.2(16.5)  | 43.5(17.4) | 0.881 |
|                                         | Male              | 123.0(45.7) | 100.2(37.2) | 70.6(23.5)  | 34.9(20.1) |       |
| κ-casein                                |                   |             |             |             |            |       |
| Maternal age (years)                    | Below 30          | 54.2(15.4)  | 44.3(10.5)  | 34.1(7.3)   | 20.1(6.5)  | 0.162 |
|                                         | 30 and above      | 46.4(15.8)  | 42.2(10.4)  | 31.1(8.4)   | 21.2(6.3)  |       |
| Education                               | Below college     | 51.8(17.9)  | 42.4(11.1)  | 33.0(6.7)   | 19.5(5.6)  | 0.645 |
|                                         | College and above | 49.9(13.9)  | 44.3(9.8)   | 32.7(9.0)   | 21.7(7.0)  |       |
| Per capita household income (RMB/month) | 4000 and below    | 49.7(18.7)  | 43.5(10.7)  | 33.7(7.2)   | 22.5(6.4)  | 0.186 |
|                                         | Above 4000        | 51.5(14.2)  | 43.3(10.3)  | 32.3(8.4)   | 19.2(6.1)  |       |
| Pre-gestational body mass index (kg/m²) | <20.7             | 51.3(14.5)  | 44.2(7.7)   | 33.0(8.2)   | 21.4(6.6)  | 0.825 |
|                                         | ≥20.7             | 50.6(17.1)  | 42.7(12.1)  | 32.7(7.8)   | 20.1(6.2)  |       |
| Mode of delivery                        | Cesarean delivery | 48.6(18.4)  | 44.0(11.4)  | 31.7(5.9)   | 23.6(6.8)* | 0.083 |
|                                         | Vaginal delivery  | 52.2(14.5)  | 43.0(9.9)   | 33.5(8.9)   | 19.0(5.6)  |       |
| Parity                                  | First parity      | 51.4(16.7)  | 43.1(9.9)   | 33.4(7.9)   | 19.7(6.3)  | 0.291 |
|                                         | Others            | 49.2(13.8)  | 44.2(12.2)  | 31.3(8.1)   | 22.9(6.0)  |       |
| Infant gender                           | Female            | 50.2(15.5)  | 46.1(9.8)   | 32.8(8.1)   | 22.8(8.0)  | 0.592 |
|                                         | Male              | 51.2(16.4)  | 41.6(10.5)  | 32.9(7.9)   | 19.4(5.0)  |       |

\*  $p < 0.05$ , \*\*  $p < 0.01$ , \*\*\*  $p < 0.001$ . Values were presented as means and standard deviations. Concentrations of milk proteins were expressed as g/100 mL. Pre-gestational body mass index was converted into a categorical variable based on the median (<20.7 or ≥20.7 kg/m<sup>2</sup>). The overall effects of baseline characteristics on the concentrations of milk proteins were investigated with the linear mixed effects models. Each model included the fixed effects of postpartum time (weeks), a predictor (maternal age, education, household income, pre-gestational body

mass index, mode of delivery, parity, and gender of infant), and an interaction item for postpartum time and the predictor, as well as a random intercept for each participant. Differences in milk protein concentrations across baseline characteristics at each time point were compared using Student's t-test. The values of lactoferrin concentration in milk were transformed to the log scale before analysis.
